# Supplementary material
Source: ML conference proceedings conference paper supplement (https://openaccess.thecvf.com/content/CVPR2024/html/Zhang_Transcending_the_Limit_CVPR_2024_paper.html)
Supplement: Supplementary file 1 [file Zhang_Transcending_the_Limit_CVPR_2024_supplemental.pdf]

# Transcending the Limit of Local Window: Advanced Super-Resolution Transformer with Adaptive Token Dictionary

## Supplementary Material

In this supplementary material, we present more implementation details and additional visual results. We first provide training details of our ATD and ATD-light model in Sec. A. Then, additional experimental results are shown in Sec. B to verify the efficacy of ATD. Finally, we present more illustrations of AC-MSA and visual examples by different models in Sec. C.

### A. Training Details

**ATD.** We follow previous works [3, 10] and choose DF2K (DIV2K [15] + Flickr2K [11]) as the training dataset for ATD. Then, we implement the training of ATD in two stages. In the first stage, we randomly crop low-resolution (LR) patches of shape  $64 \times 64$  and the corresponding high-resolution (HR) image patches for training. The batch size is set to 32, while commonly used data augmentation tricks including random rotation and horizontal flipping are adopted in our training stage. We adopt AdamW [12] optimizer with  $\beta_1 = 0.9, \beta_2 = 0.9$  to minimize  $L_1$  pixel loss between HR estimation and ground truth. For the case of  $\times 2$  zooming factor, we train the model from scratch for 300k iterations. The learning rate is initially set as  $2 \times 10^{-4}$  and halved at 250k iteration milestone. In the second stage, we increase the patch size to  $96 \times 96$  for another 250k training iterations to better explore the potential of AC-MSA. We initialize the learning rate as  $2 \times 10^{-4}$  and halve it at [150k, 200k, 225k, 240k] iteration milestones. We omit the first stage for  $\times 3$  and  $\times 4$  models to save time, only adopting the second stage for finetuning these models based on the well-trained  $\times 2$  model. To ensure a smooth training process for the token dictionary, we set warm-up iterations at the beginning of each stage. During this period, the learning rate gradually increases from zero to the initial learning rate.

**ATD-light.** To make fair comparisons with previous SOTA methods, we only employ DIV2K as training dataset. Same as ATD and previous methods, we train the  $\times 2$  model from scratch and finetune the  $\times 3$  and  $\times 4$  models from the  $\times 2$  one. Specifically, we train the  $\times 2$  ATD-light model for 500k iterations from scratch and finetune the  $\times 3, \times 4$  model for 250k iterations based on the well-trained  $\times 2$  model. The larger patch size used for ATD is not applied to ATD-light. The initial learning rate and iteration milestone for halving learning rate are set as  $5 \times 10^{-4}$ , [250k, 400k, 450k, 475k, 490k] for  $\times 2$  model and  $2 \times 10^{-4}$ , [150k, 200k, 225k, 240k] for  $\times 3, \times 4$  models. The rest of the training settings are kept the same as ATD.

Table B.1. Model size and computational burden comparisons between ATD and recent state-of-the-art methods.

| Model | Params | FLOPs | Urban100 |        | Manga109 |        |
|-------|--------|-------|----------|--------|----------|--------|
|       |        |       | PSNR     | SSIM   | PSNR     | SSIM   |
| CAT-A | 16.6M  | 360G  | 27.89    | 0.8339 | 32.39    | 0.9285 |
| HAT   | 20.8M  | 412G  | 27.97    | 0.9368 | 32.48    | 0.9292 |
| ATD   | 20.3M  | 417G  | 28.17    | 0.8404 | 32.63    | 0.9306 |

### B. More Experimental Results

#### B.1. Analysis on Model Size and Computational Burden.

In this subsection, we analyze the model size of the proposed ATD model. As shown in Tab. B.1, we present the accuracy of image restoration (PSNR), model size (number of parameters) and computational burden (FLOPs) comparison between ATD and recent state-of-the-art models on image SR task. Results in the table clearly demonstrate that the proposed ATD model helps the network achieve a better trade-off between restoration accuracy and model size. Our ATD method achieves better SR results with comparable model size and complexity to HAT. Furthermore, ATD outperforms CAT-A by up to 0.22 dB with only 10% more parameters and FLOPs.

#### B.2. Image Super-Resolution Results.

In this subsection, we present the complete image super-resolution results in Tab. B.2 and Tab. B.3. In addition to producing remarkable results in  $\times 2$  and  $\times 4$  SR, ATD and ATD-light also achieve impressive improvements of up to 0.38 dB in the  $\times 3$  case.

### C. More Visual Examples

#### C.1. More Visualization of AC-MSA.

In this subsection, we provide illustrations of the Categorize operation and more visual examples of categorization results in Fig. C.1 and Fig. C.2. We visualize only a few categories for each input image for simplicity. In the Categorize operation, pixels are first sorted and classified into  $\theta^1, \theta^2, \dots, \theta^M$  based on the value of attention map. Then, each category is flattened and concatenated sequentially. Although certain pixels not belonging to the same category may be assigned to the same sub-category, it has almost no impact on performance. This is because the number of misassignments will not exceed the dictionary size

Table B.2. Quantitative comparison (PSNR/SSIM) with state-of-the-art methods on **classical SR** task. The best and second best results are colored with **red** and **blue**.

| Method      | Scale | Params | Set5         |               | Set14        |               | BSD100       |               | Urban100     |               | Manga109     |               |
|-------------|-------|--------|--------------|---------------|--------------|---------------|--------------|---------------|--------------|---------------|--------------|---------------|
|             |       |        | PSNR         | SSIM          |
| EDSR [11]   | ×2    | 42.6M  | 38.11        | 0.9602        | 33.92        | 0.9195        | 32.32        | 0.9013        | 32.93        | 0.9351        | 39.10        | 0.9773        |
| RCAN [19]   | ×2    | 15.4M  | 38.27        | 0.9614        | 34.12        | 0.9216        | 32.41        | 0.9027        | 33.34        | 0.9384        | 39.44        | 0.9786        |
| SAN [6]     | ×2    | 15.7M  | 38.31        | 0.9620        | 34.07        | 0.9213        | 32.42        | 0.9028        | 33.10        | 0.9370        | 39.32        | 0.9792        |
| HAN [14]    | ×2    | 63.6M  | 38.27        | 0.9614        | 34.16        | 0.9217        | 32.41        | 0.9027        | 33.35        | 0.9385        | 39.46        | 0.9785        |
| IPT [2]     | ×2    | 115M   | 38.37        | -             | 34.43        | -             | 32.48        | -             | 33.76        | -             | -            | -             |
| SwinIR [10] | ×2    | 11.8M  | 38.42        | 0.9623        | 34.46        | 0.9250        | 32.53        | 0.9041        | 33.81        | 0.9433        | 39.92        | 0.9797        |
| EDT [9]     | ×2    | 11.5M  | 38.45        | 0.9624        | 34.57        | 0.9258        | 32.52        | 0.9041        | 33.80        | 0.9425        | 39.93        | 0.9800        |
| CAT-A [4]   | ×2    | 16.5M  | 38.51        | 0.9626        | 34.78        | 0.9265        | 32.59        | 0.9047        | 34.26        | 0.9440        | 40.10        | 0.9805        |
| ART [17]    | ×2    | 16.4M  | 38.56        | 0.9629        | 34.59        | 0.9267        | 32.58        | 0.9048        | 34.30        | 0.9452        | 40.24        | 0.9808        |
| HAT [3]     | ×2    | 20.6M  | <b>38.63</b> | <b>0.9630</b> | <b>34.86</b> | <b>0.9274</b> | <b>32.62</b> | <b>0.9053</b> | <b>34.45</b> | <b>0.9466</b> | <b>40.26</b> | <b>0.9809</b> |
| ATD (ours)  | ×2    | 20.1M  | <b>38.61</b> | <b>0.9629</b> | <b>34.92</b> | <b>0.9275</b> | <b>32.64</b> | <b>0.9054</b> | <b>34.73</b> | <b>0.9476</b> | <b>40.35</b> | <b>0.9810</b> |
| EDSR [11]   | ×3    | 43.0M  | 34.65        | 0.9280        | 30.52        | 0.8462        | 29.25        | 0.8093        | 28.80        | 0.8653        | 34.17        | 0.9476        |
| RCAN [19]   | ×3    | 15.6M  | 34.74        | 0.9299        | 30.65        | 0.8482        | 29.32        | 0.8111        | 29.09        | 0.8702        | 34.44        | 0.9499        |
| SAN [6]     | ×3    | 15.9M  | 34.75        | 0.9300        | 30.59        | 0.8476        | 29.33        | 0.8112        | 28.93        | 0.8671        | 34.30        | 0.9494        |
| HAN [14]    | ×3    | 64.2M  | 34.75        | 0.9299        | 30.67        | 0.8483        | 29.32        | 0.8110        | 29.10        | 0.8705        | 34.48        | 0.9500        |
| IPT [2]     | ×3    | 116M   | 34.81        | -             | 30.85        | -             | 29.38        | -             | 29.49        | -             | -            | -             |
| SwinIR [10] | ×3    | 11.9M  | 34.97        | 0.9318        | 30.93        | 0.8534        | 29.46        | 0.8145        | 29.75        | 0.8826        | 35.12        | 0.9537        |
| EDT [9]     | ×3    | 11.6M  | 34.97        | 0.9316        | 30.89        | 0.8527        | 29.44        | 0.8142        | 29.72        | 0.8814        | 35.13        | 0.9534        |
| CAT-A [4]   | ×3    | 16.6M  | 35.06        | 0.9326        | 31.04        | 0.8538        | 29.52        | 0.8160        | 30.12        | 0.8862        | 35.38        | 0.9546        |
| ART [17]    | ×3    | 16.6M  | <b>35.07</b> | 0.9325        | 31.02        | 0.8541        | 29.51        | 0.8159        | 30.10        | 0.8871        | 35.39        | 0.9548        |
| HAT [3]     | ×3    | 20.8M  | <b>35.07</b> | <b>0.9329</b> | <b>31.08</b> | <b>0.8555</b> | <b>29.54</b> | <b>0.8167</b> | <b>30.23</b> | <b>0.8896</b> | <b>35.53</b> | <b>0.9552</b> |
| ATD (ours)  | ×3    | 20.3M  | <b>35.15</b> | <b>0.9331</b> | <b>31.15</b> | <b>0.8556</b> | <b>29.58</b> | <b>0.8175</b> | <b>30.52</b> | <b>0.8924</b> | <b>35.64</b> | <b>0.9558</b> |
| EDSR [11]   | ×4    | 43.0M  | 32.46        | 0.8968        | 28.80        | 0.7876        | 27.71        | 0.7420        | 26.64        | 0.8033        | 31.02        | 0.9148        |
| RCAN [19]   | ×4    | 15.6M  | 32.63        | 0.9002        | 28.87        | 0.7889        | 27.77        | 0.7436        | 26.82        | 0.8087        | 31.22        | 0.9173        |
| SAN [6]     | ×4    | 15.9M  | 32.64        | 0.9003        | 28.92        | 0.7888        | 27.78        | 0.7436        | 26.79        | 0.8068        | 31.18        | 0.9169        |
| HAN [14]    | ×4    | 64.2M  | 32.64        | 0.9002        | 28.90        | 0.7890        | 27.80        | 0.7442        | 26.85        | 0.8094        | 31.42        | 0.9177        |
| IPT [2]     | ×4    | 116M   | 32.64        | -             | 29.01        | -             | 27.82        | -             | 27.26        | -             | -            | -             |
| SwinIR [10] | ×4    | 11.9M  | 32.92        | 0.9044        | 29.09        | 0.7950        | 27.92        | 0.7489        | 27.45        | 0.8254        | 32.03        | 0.9260        |
| EDT [9]     | ×4    | 11.6M  | 32.82        | 0.9031        | 29.09        | 0.7939        | 27.91        | 0.7483        | 27.46        | 0.8246        | 32.05        | 0.9254        |
| CAT-A [4]   | ×4    | 16.6M  | <b>33.08</b> | 0.9052        | 29.18        | 0.7960        | 27.99        | 0.7510        | 27.89        | 0.8339        | 32.39        | 0.9285        |
| ART [17]    | ×4    | 16.6M  | 33.04        | 0.9051        | 29.16        | 0.7958        | 27.97        | 0.7510        | 27.77        | 0.8321        | 32.31        | 0.9283        |
| HAT [3]     | ×4    | 20.8M  | 33.04        | <b>0.9056</b> | <b>29.23</b> | <b>0.7973</b> | <b>28.00</b> | <b>0.7517</b> | <b>27.97</b> | <b>0.8368</b> | <b>32.48</b> | <b>0.9292</b> |
| ATD (ours)  | ×4    | 20.3M  | <b>33.14</b> | <b>0.9061</b> | <b>29.25</b> | <b>0.7976</b> | <b>28.02</b> | <b>0.7524</b> | <b>28.22</b> | <b>0.8414</b> | <b>32.65</b> | <b>0.9308</b> |

Table B.3. Quantitative comparison (PSNR/SSIM) with state-of-the-art methods on **lightweight SR** task. The best and second best results are colored with **red** and **blue**.

| Method            | Scale | Params | Set5         |               | Set14        |               | BSD100       |               | Urban100     |               | Manga109     |               |
|-------------------|-------|--------|--------------|---------------|--------------|---------------|--------------|---------------|--------------|---------------|--------------|---------------|
|                   |       |        | PSNR         | SSIM          |
| CARN [1]          | ×2    | 1,592K | 37.76        | 0.9590        | 33.52        | 0.9166        | 32.09        | 0.8978        | 31.92        | 0.9256        | 38.36        | 0.9765        |
| IMDN [7]          | ×2    | 694K   | 38.00        | 0.9605        | 33.63        | 0.9177        | 32.19        | 0.8996        | 32.17        | 0.9283        | 38.88        | 0.9774        |
| LAPAR-A [8]       | ×2    | 548K   | 38.01        | 0.9605        | 33.62        | 0.9183        | 32.19        | 0.8999        | 32.10        | 0.9283        | 38.67        | 0.9772        |
| LatticeNet [13]   | ×2    | 756K   | 38.15        | 0.9610        | 33.78        | 0.9193        | 32.25        | 0.9005        | 32.43        | 0.9302        | -            | -             |
| SwinIR-light [10] | ×2    | 910K   | 38.14        | 0.9611        | 33.86        | 0.9206        | 32.31        | 0.9012        | 32.76        | 0.9340        | 39.12        | 0.9783        |
| ELAN [18]         | ×2    | 582K   | 38.17        | 0.9611        | 33.94        | 0.9207        | 32.30        | 0.9012        | 32.76        | 0.9340        | 39.11        | 0.9782        |
| SwinIR-NG [5]     | ×2    | 1181K  | 38.17        | 0.9612        | 33.94        | 0.9205        | 32.31        | 0.9013        | 32.78        | 0.9340        | 39.20        | 0.9781        |
| OmniSR [16]       | ×2    | 772K   | <b>38.22</b> | <b>0.9613</b> | <b>33.98</b> | <b>0.9210</b> | <b>32.36</b> | <b>0.9020</b> | <b>33.05</b> | <b>0.9363</b> | <b>39.28</b> | <b>0.9784</b> |
| ATD-light (Ours)  | ×2    | 753K   | <b>38.29</b> | <b>0.9616</b> | <b>34.10</b> | <b>0.9217</b> | <b>32.39</b> | <b>0.9023</b> | <b>33.27</b> | <b>0.9375</b> | <b>39.52</b> | <b>0.9789</b> |
| CARN [1]          | ×3    | 1,592K | 34.29        | 0.9255        | 30.29        | 0.8407        | 29.06        | 0.8034        | 28.06        | 0.8493        | 33.50        | 0.9440        |
| IMDN [7]          | ×3    | 703K   | 34.36        | 0.9270        | 30.32        | 0.8417        | 29.09        | 0.8046        | 28.17        | 0.8519        | 33.61        | 0.9445        |
| LAPAR-A [8]       | ×3    | 544K   | 34.36        | 0.9267        | 30.34        | 0.8421        | 29.11        | 0.8054        | 28.15        | 0.8523        | 33.51        | 0.9441        |
| LatticeNet [13]   | ×3    | 765K   | 34.53        | 0.9281        | 30.39        | 0.8424        | 29.15        | 0.8059        | 28.33        | 0.8538        | -            | -             |
| SwinIR-light [10] | ×3    | 918K   | 34.62        | 0.9289        | 30.54        | 0.8463        | 29.20        | 0.8082        | 28.66        | 0.8624        | 33.98        | 0.9478        |
| ELAN [18]         | ×3    | 590K   | 34.61        | 0.9288        | 30.55        | 0.8463        | 29.21        | 0.8081        | 28.69        | 0.8624        | 34.00        | 0.9478        |
| SwinIR-NG [5]     | ×3    | 1190K  | 34.64        | 0.9293        | <b>30.58</b> | <b>0.8471</b> | 29.24        | 0.8090        | 28.75        | 0.8639        | <b>34.22</b> | <b>0.9488</b> |
| OmniSR [16]       | ×3    | 780K   | <b>34.70</b> | <b>0.9294</b> | 30.57        | 0.8469        | <b>29.28</b> | <b>0.8094</b> | <b>28.84</b> | <b>0.8656</b> | <b>34.22</b> | 0.9487        |
| ATD-light (ours)  | ×3    | 760K   | <b>34.74</b> | <b>0.9300</b> | <b>30.68</b> | <b>0.8485</b> | <b>29.32</b> | <b>0.8109</b> | <b>29.17</b> | <b>0.8709</b> | <b>34.60</b> | <b>0.9506</b> |
| CARN [1]          | ×4    | 1,592K | 32.13        | 0.8937        | 28.60        | 0.7806        | 27.58        | 0.7349        | 26.07        | 0.7837        | 30.47        | 0.9084        |
| IMDN [7]          | ×4    | 715K   | 32.21        | 0.8948        | 28.58        | 0.7811        | 27.56        | 0.7353        | 26.04        | 0.7838        | 30.45        | 0.9075        |
| LAPAR-A [8]       | ×4    | 659K   | 32.15        | 0.8944        | 28.61        | 0.7818        | 27.61        | 0.7366        | 26.14        | 0.7871        | 30.42        | 0.9074        |
| LatticeNet [13]   | ×4    | 777K   | 32.30        | 0.8962        | 28.68        | 0.7830        | 27.62        | 0.7367        | 26.25        | 0.7873        | -            | -             |
| SwinIR-light [10] | ×4    | 930K   | 32.44        | 0.8976        | 28.77        | 0.7858        | 27.69        | 0.7406        | 26.47        | 0.7980        | 30.92        | 0.9151        |
| ELAN [18]         | ×4    | 582K   | 32.43        | 0.8975        | 28.78        | 0.7858        | 27.69        | 0.7406        | 26.54        | 0.7982        | 30.92        | 0.9150        |
| SwinIR-NG [5]     | ×4    | 1201K  | 32.44        | 0.8980        | <b>28.83</b> | <b>0.7870</b> | <b>27.73</b> | <b>0.7418</b> | 26.61        | 0.8010        | <b>31.09</b> | <b>0.9161</b> |
| OmniSR [16]       | ×4    | 792K   | <b>32.49</b> | <b>0.8988</b> | 28.78        | 0.7859        | 27.71        | 0.7415        | <b>26.65</b> | <b>0.8018</b> | 31.02        | 0.9151        |
| ATD-light (Ours)  | ×4    | 769K   | <b>32.63</b> | <b>0.8998</b> | <b>28.89</b> | <b>0.7886</b> | <b>27.79</b> | <b>0.7440</b> | <b>26.97</b> | <b>0.8107</b> | <b>31.48</b> | <b>0.9198</b> |

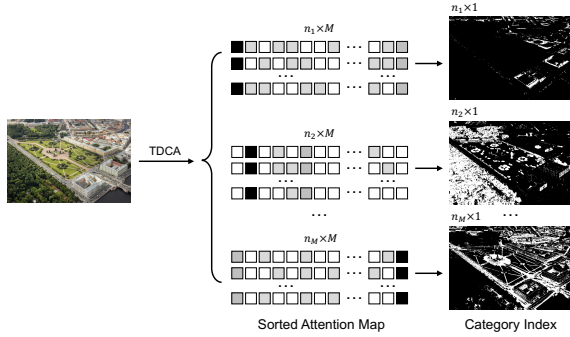

Figure C.1. An illustration of the Categorize operation. With the attention map obtained by TDCA operation, we assign a category index to each pixel based on the highest similarity between the pixel and the token dictionary.

$M = 128$ , which is much less than the number of sub-categories  $HW/n_s$ .

The following visual examples further demonstrate that the categorize operation is capable of grouping similar textures together. We can see that the categorize operation performs well on various types of image, including either natural or cartoon images.

## C.2. More Visual Comparisons.

In this subsection, we provide more visual comparisons between our ATD models and state-of-the-art methods. As shown in Fig. C.3 and Fig. C.4, ATD and ATD-light both yield better visual results. Specifically, ATD recovers sharper edges in img011 and img027, while the output of other methods remains blurry. Moreover, most existing methods fail to reconstruct correct shape of the black blocks in Donburakokko. In contrast, the output of ATD-light is more accurate to the rectangular shape in the ground truth.

## References

- [1] Namhyuk Ahn, Byungkon Kang, and Kyung-Ah Sohn. Fast, accurate, and lightweight super-resolution with cascading residual network, 2018. 2
- [2] Hanting Chen, Yunhe Wang, Tianyu Guo, Chang Xu, Yiping Deng, Zhenhua Liu, Siwei Ma, Chunjing Xu, Chao Xu, and Wen Gao. Pre-trained image processing transformer, 2020. 2
- [3] Xiangyu Chen, Xintao Wang, Jiantao Zhou, Yu Qiao, and Chao Dong. Activating more pixels in image super-resolution transformer. In *Proceedings of the IEEE/CVF Conference on Computer Vision and Pattern Recognition (CVPR)*, pages 22367–22377, 2023. 1, 2
- [4] Zheng Chen, Yulun Zhang, Jinjin Gu, Yongbing Zhang, Linghe Kong, and Xin Yuan. Cross aggregation transformer for image restoration. In *NeurIPS*, 2022. 2
- [5] Haram Choi, Jeongmin Lee, and Jihoon Yang. N-gram in swin transformers for efficient lightweight image super-resolution, 2022. 2
- [6] Tao Dai, Jianrui Cai, Yongbing Zhang, Shu-Tao Xia, and Lei Zhang. Second-order attention network for single image super-resolution. In *2019 IEEE/CVF Conference on Computer Vision and Pattern Recognition (CVPR)*, 2020. 2
- [7] Zheng Hui, Xinbo Gao, Yunchu Yang, and Xiumei Wang. Lightweight image super-resolution with information multi-distillation network. In *Proceedings of the 27th ACM International Conference on Multimedia*, 2019. 2
- [8] Wenbo Li, Kun Zhou, Lu Qi, Nianjuan Jiang, Jiangbo Lu, and Jiaya Jia. Lapar: Linearly-assembled pixel-adaptive regression network for single image super-resolution and beyond, 2020. 2
- [9] Wenbo Li, Xin Lu, Jiangbo Lu, Xiangyu Zhang, and Jiaya Jia. On efficient transformer and image pre-training for low-level vision. *arXiv preprint arXiv:2112.10175*, 2021. 2
- [10] Jingyun Liang, Jiezhong Cao, Guolei Sun, Kai Zhang, Luc Van Gool, and Radu Timofte. Swinir: Image restoration using swin transformer, 2021. 1, 2
- [11] Bee Lim, Sanghyun Son, Heewon Kim, Seungjun Nah, and Kyoung Mu Lee. Enhanced deep residual networks for single image super-resolution. In *2017 IEEE Conference on Computer Vision and Pattern Recognition Workshops (CVPRW)*, 2017. 1, 2
- [12] Ilya Loshchilov and Frank Hutter. Decoupled weight decay regularization. In *International Conference on Learning Representations*, 2018. 1
- [13] Xiaotong Luo, Yuan Xie, Yulun Zhang, Yanyun Qu, Cuihua Li, and Yun Fu. *LatticeNet: Towards Lightweight Image Super-Resolution with Lattice Block*, page 272–289. 2020. 2
- [14] Ben Niu, Weilei Wen, Wenqi Ren, Xiangde Zhang, Lianping Yang, Shuzhen Wang, Kaihao Zhang, Xiaochun Cao, and Haifeng Shen. *Single Image Super-Resolution via a Holistic Attention Network*, page 191–207. 2020. 2
- [15] Radu Timofte, Eirikur Agustsson, Luc Van Gool, Ming-Hsuan Yang, Lei Zhang, Bee Lim, Sanghyun Son, Heewon Kim, Seungjun Nah, Kyoung Mu Lee, et al. Ntire 2017 challenge on single image super-resolution: Methods and results. In *2017 IEEE Conference on Computer Vision and Pattern Recognition Workshops (CVPRW)*, 2017. 1
- [16] Hang Wang, Xuanhong Chen, Bingbing Ni, Yutian Liu, and Liu jinfan. Omni aggregation networks for lightweight image super-resolution. In *Conference on Computer Vision and Pattern Recognition*, 2023. 2
- [17] Jiale Zhang, Yulun Zhang, Jinjin Gu, Yongbing Zhang, Linghe Kong, and Xin Yuan. Accurate image restoration with attention retractable transformer. In *ICLR*, 2023. 2
- [18] Xindong Zhang, Hui Zeng, Shi Guo, and Lei Zhang. Efficient long-range attention network for image super-resolution. In *European Conference on Computer Vision*, 2022. 2
- [19] Yulun Zhang, Kungpeng Li, Kai Li, Lichen Wang, Bineng Zhong, and Yun Fu. *Image Super-Resolution Using Very Deep Residual Channel Attention Networks*, page 294–310. 2018. 2

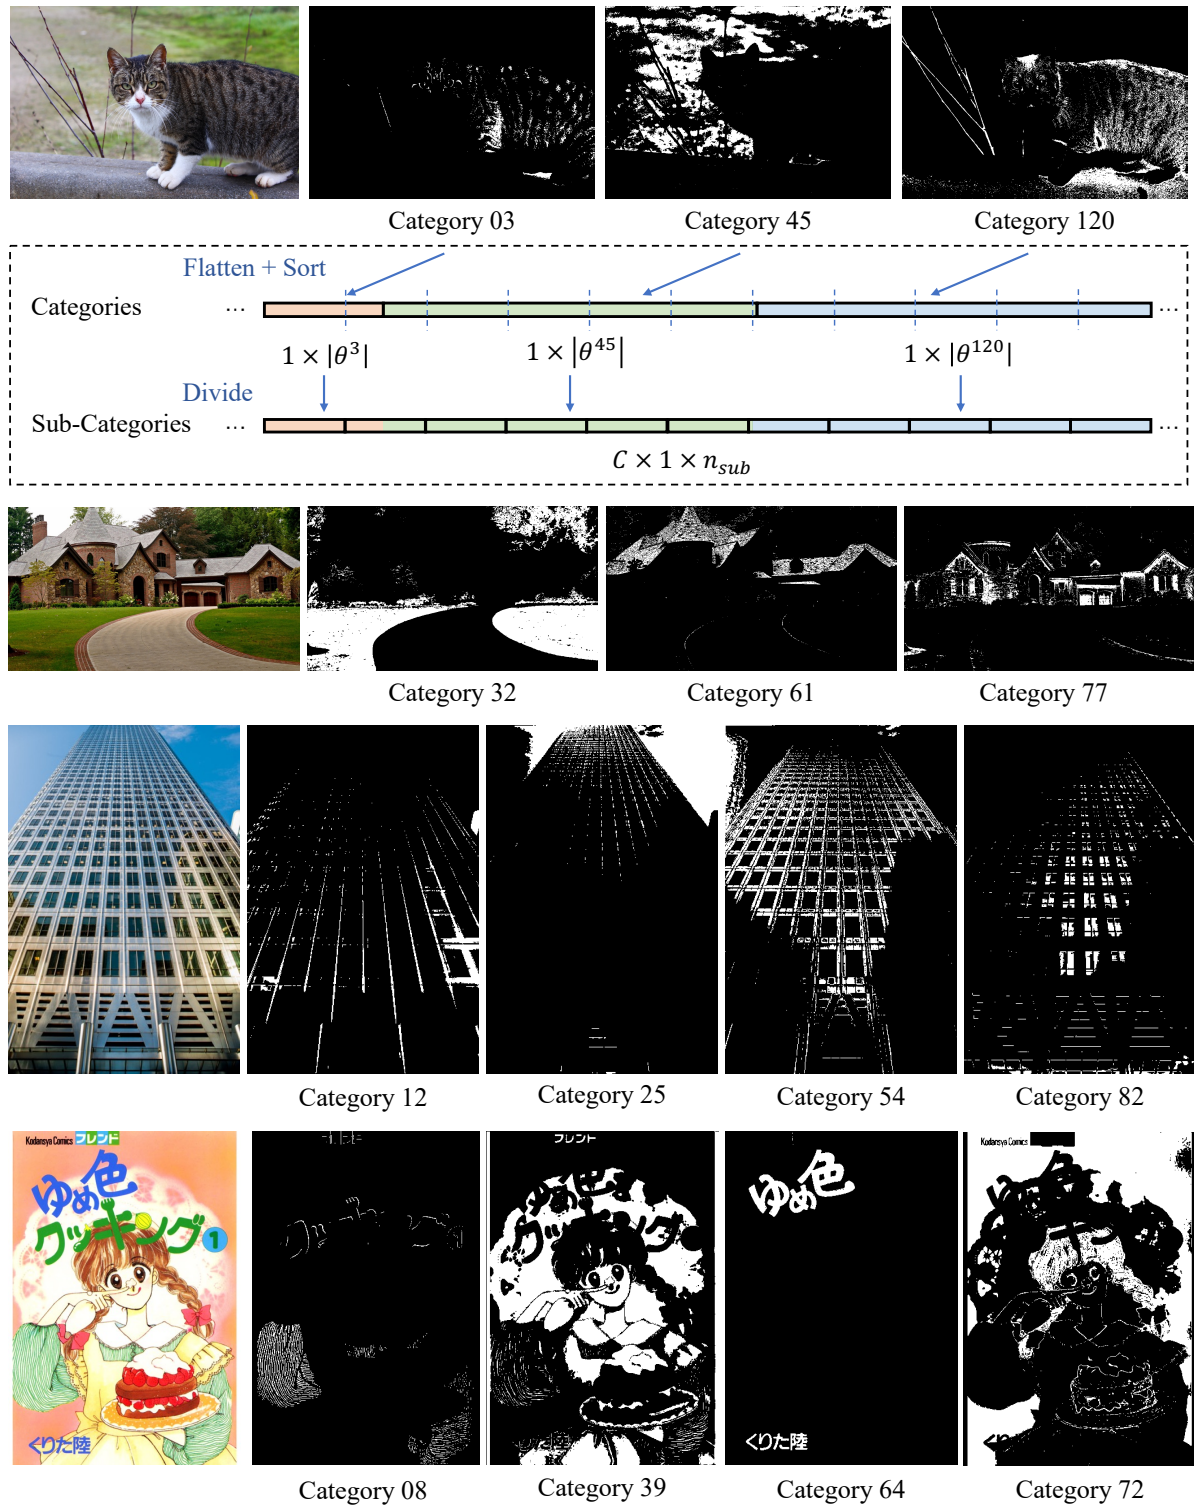

Figure C.2. An illustration of the Categorize operation, along with several visual examples of the categorization results. The white area in each binarized image represents a single category. Pixels in each category are flattened and then sorted for further dividing into sub-categories. These categorization results indicate that our AC-MSA is capable of dividing the image by the class of each pixel. Therefore, areas with similar texture (for example, sky, grass, roof) are grouped into the same category.

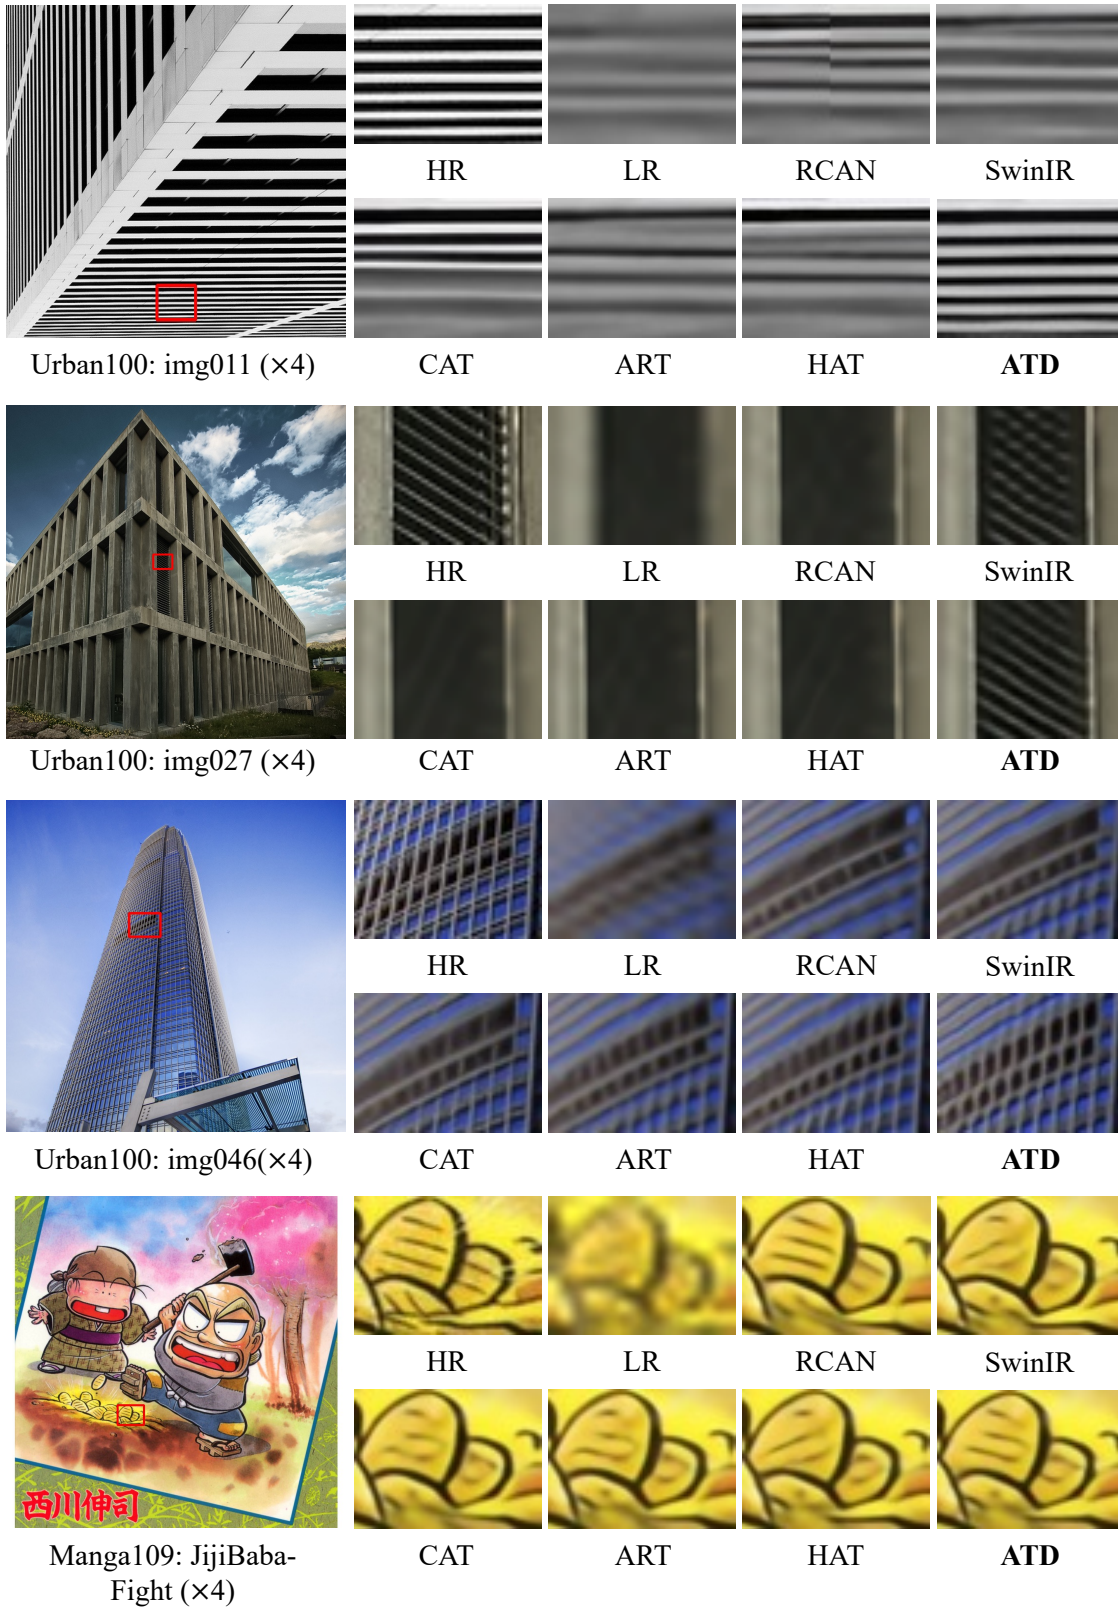

Figure C.3. Visual comparisons between ATD and state-of-the-art classical SR methods.

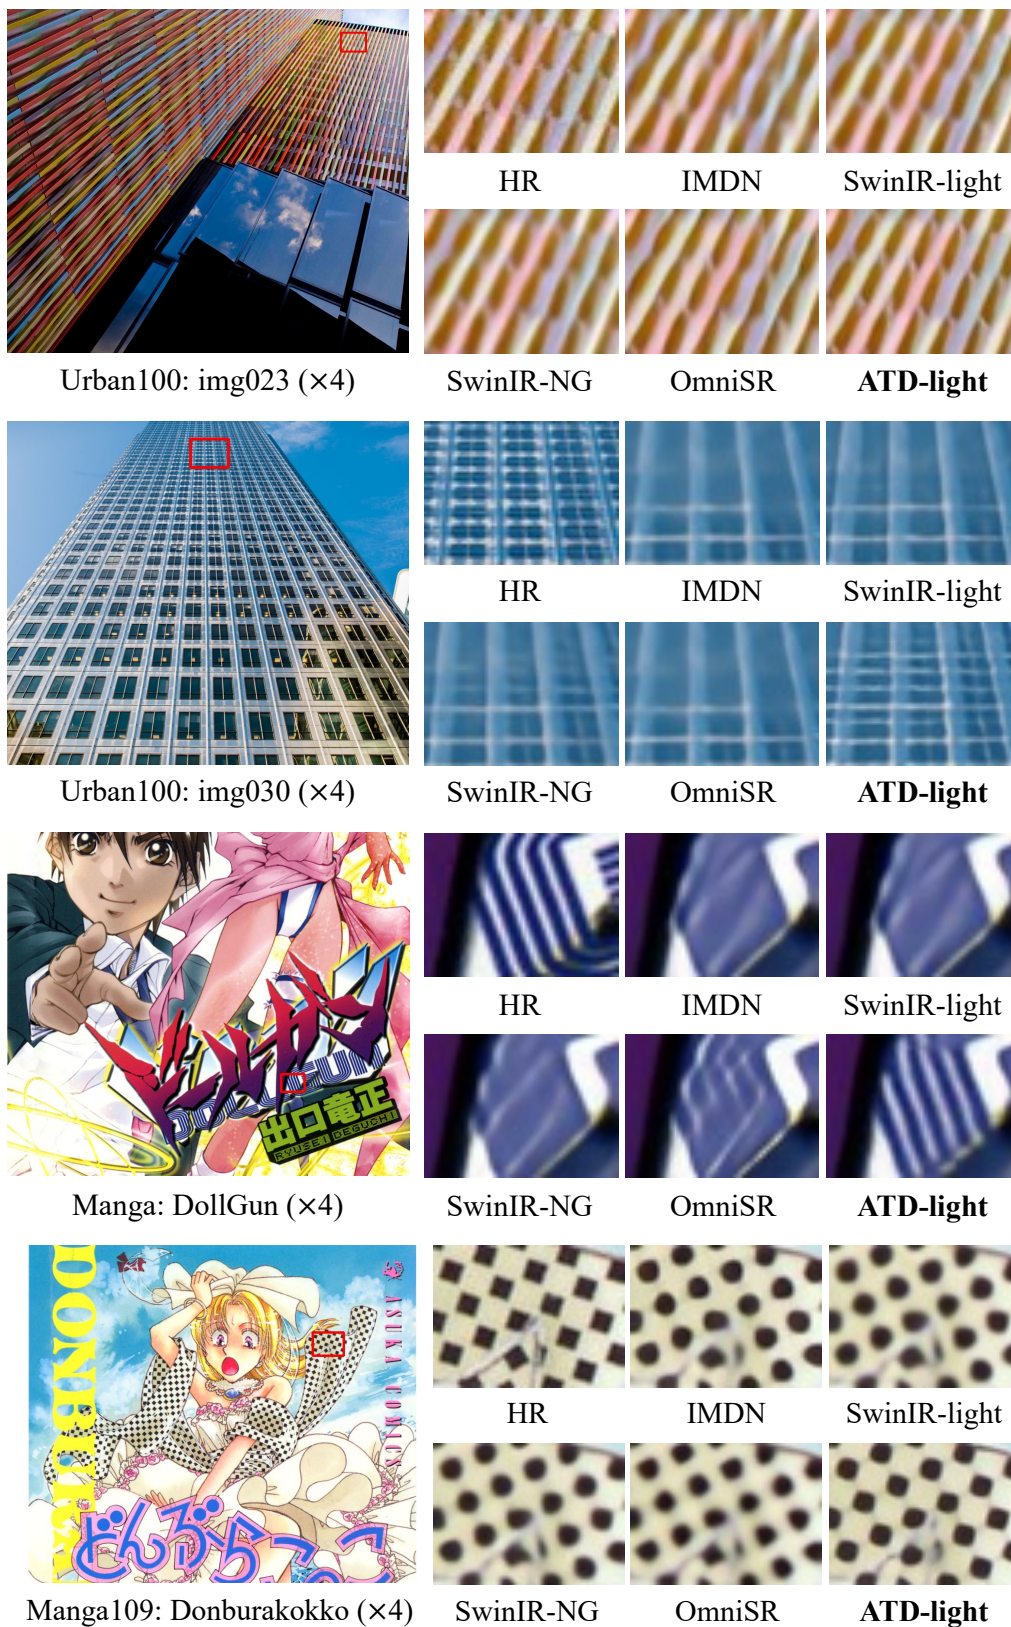

Figure C.4. Visual comparisons between ATD-light and state-of-the-art lightweight SR methods.
